# Supplementary material for: Human Adrenocortical Remodeling Leading to Aldosterone-Producing Cell Cluster Generation
Source: Hindawi journal article supplement (doi:10.1155/2016/7834356), 2016-01-01
Supplement: f1 [file 7834356.f1.pdf]

# Supplementary Figure 1

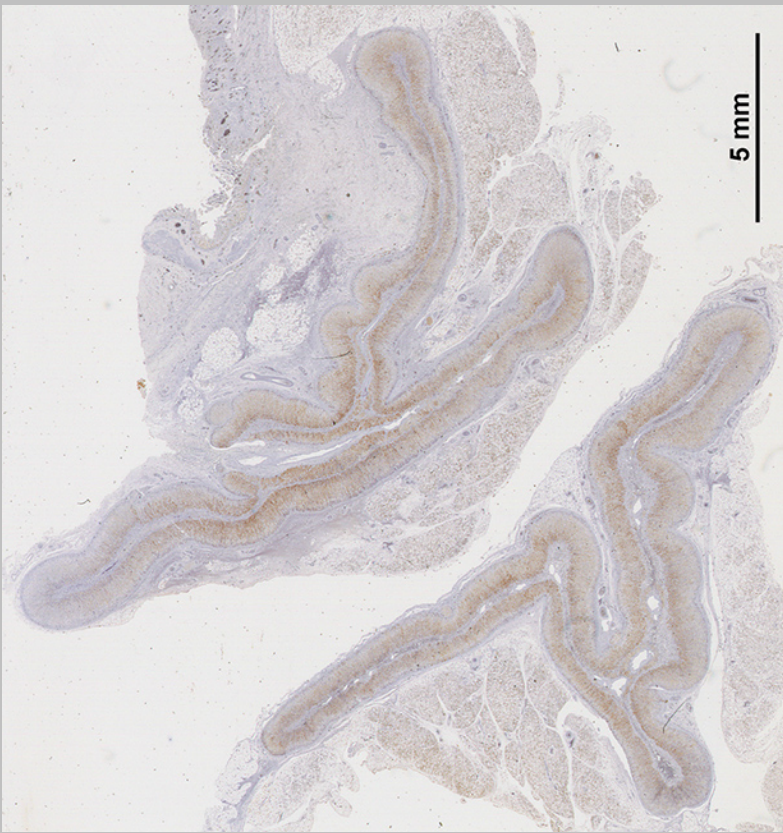

Case 1, A021

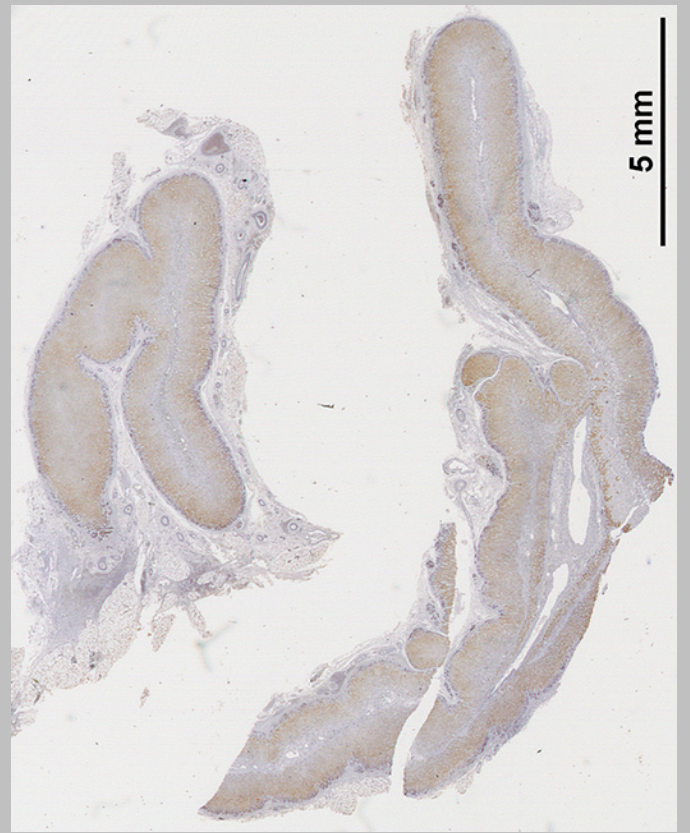

Case 2, A022

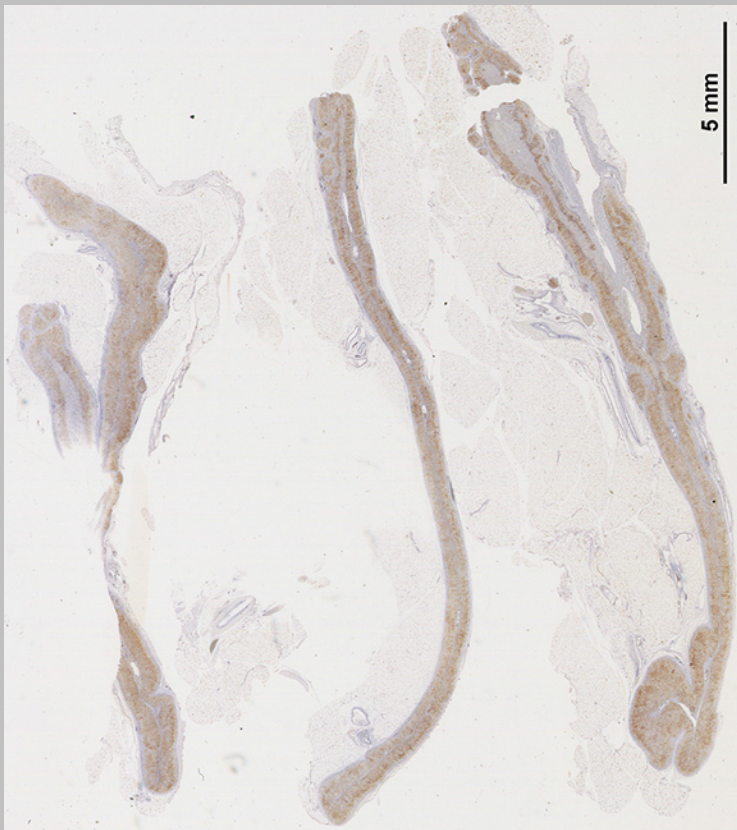

Case 3, A023

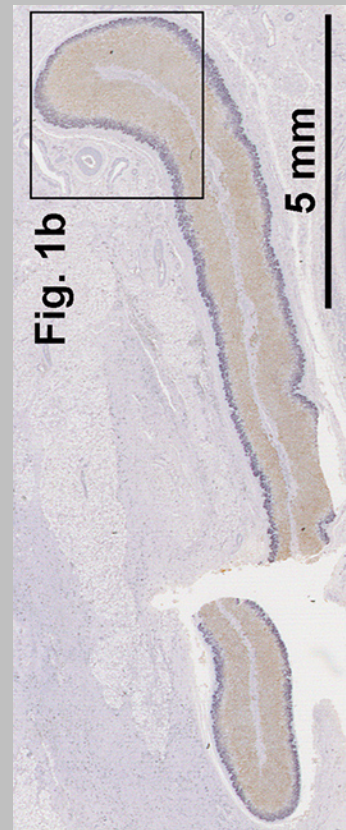

Case 4, A024

# Supplementary Figure 1

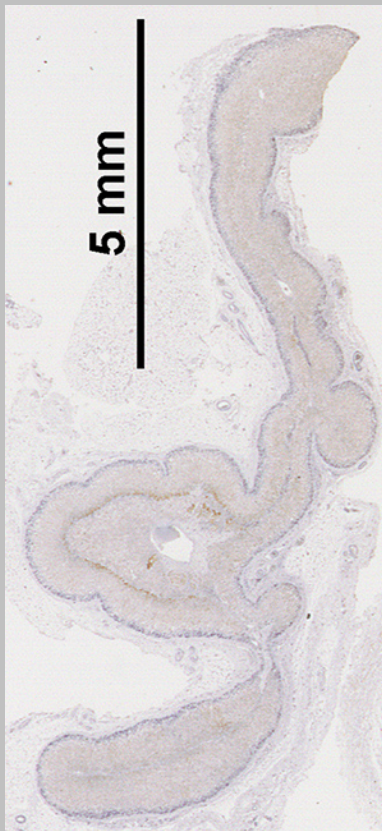

Case 5, A025

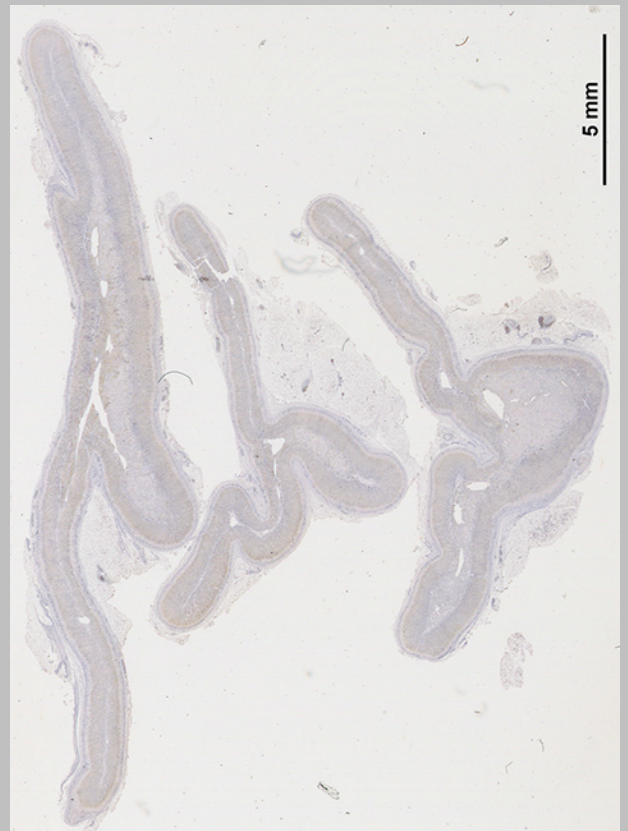

Case 6, A026

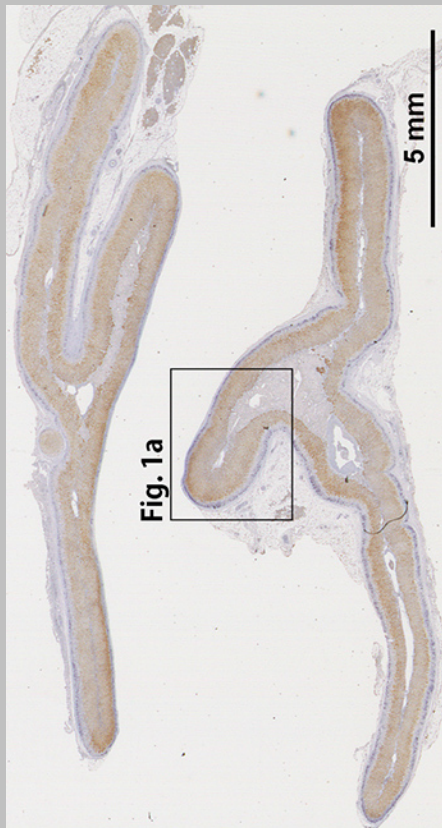

Case 7, A027

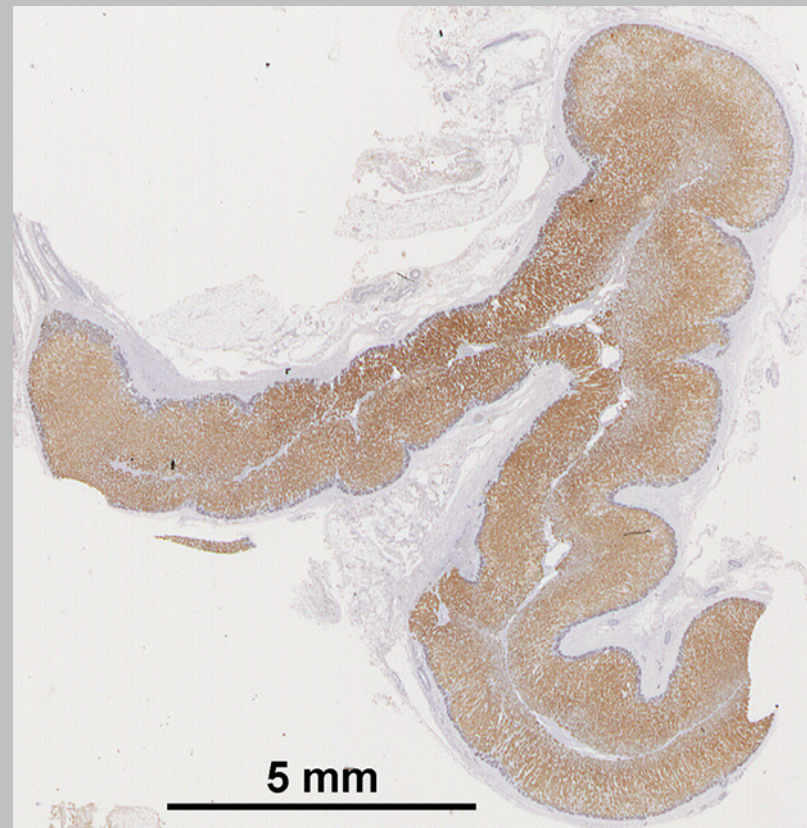

Case 8, A028

# Supplementary Figure 1

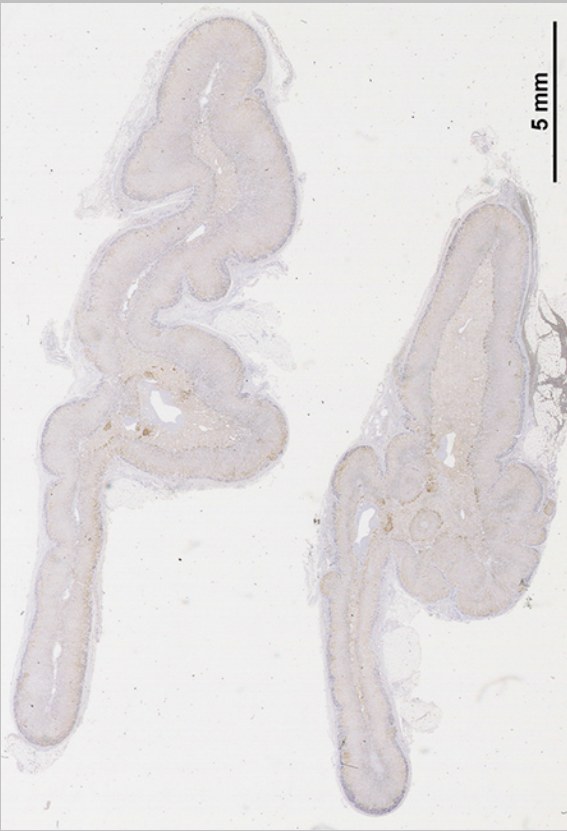

Case 10, A030

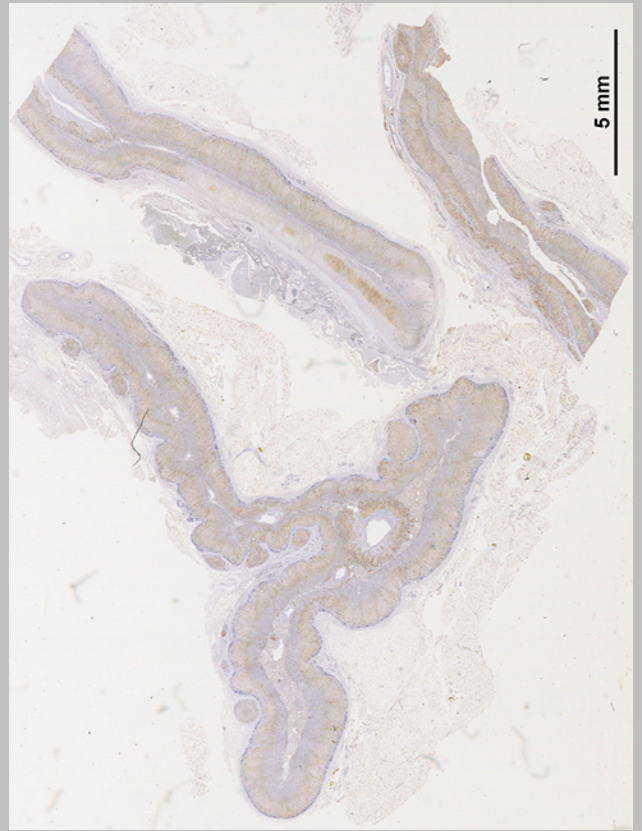

Case 12, A032

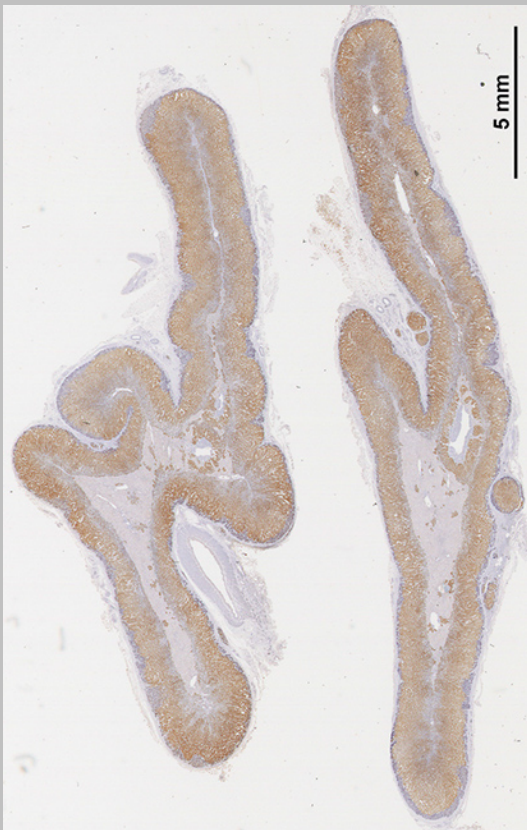

Case 14, A034

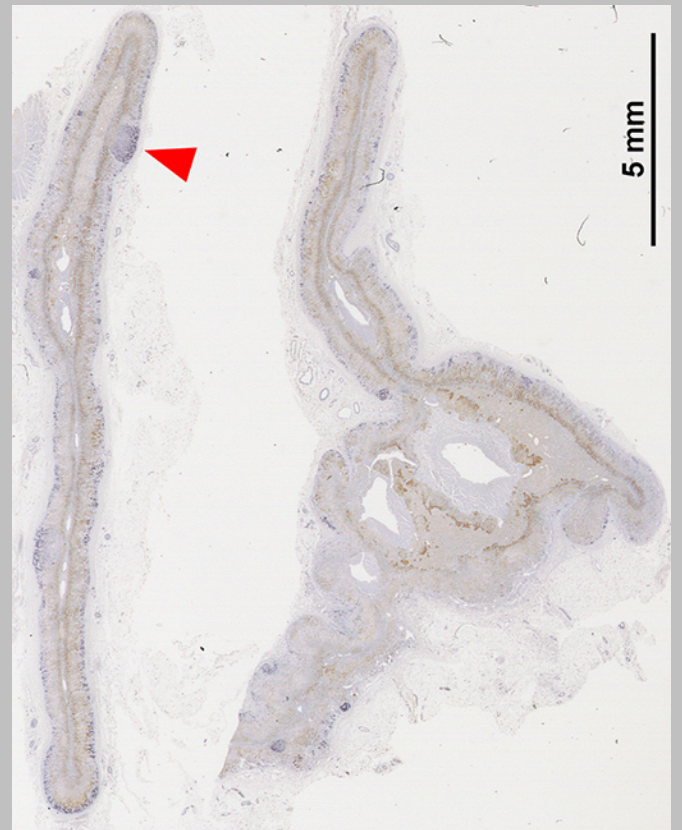

Case 16, A036

# Supplementary Figure 1

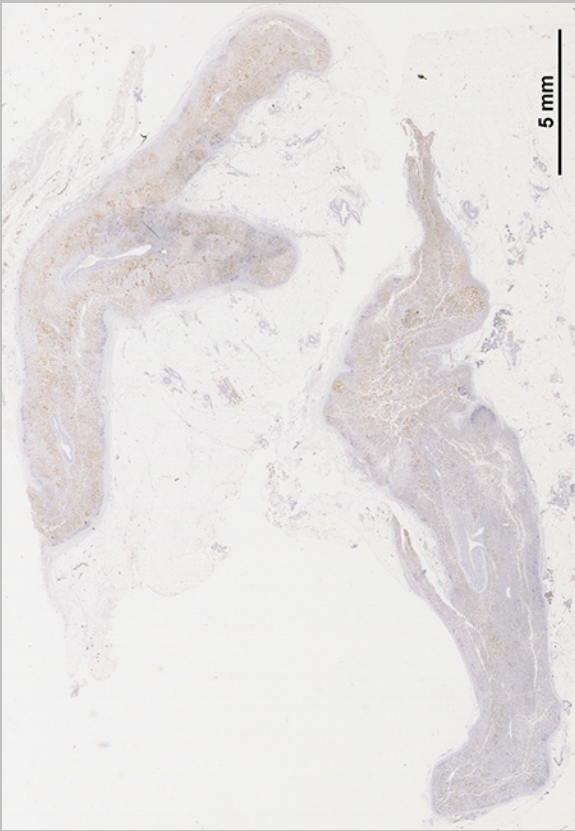

Case 19, A039

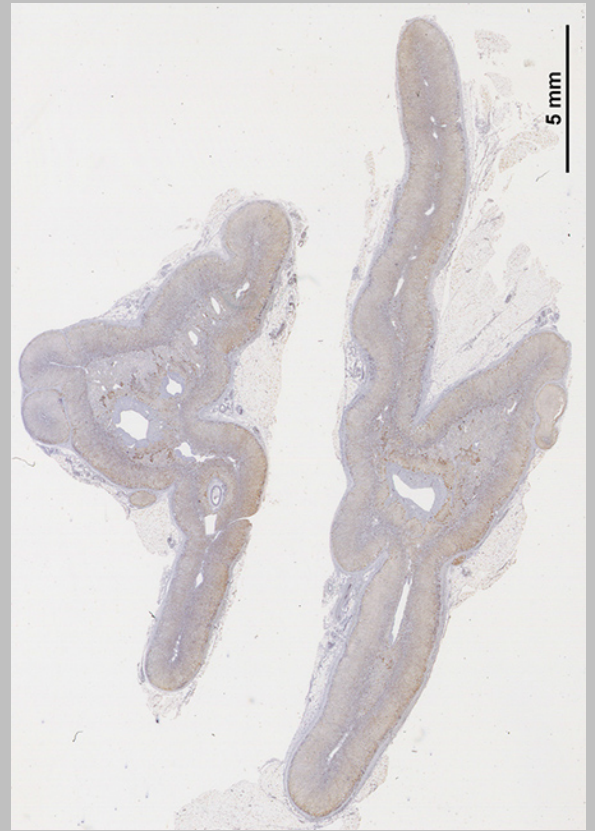

Case 21, A042

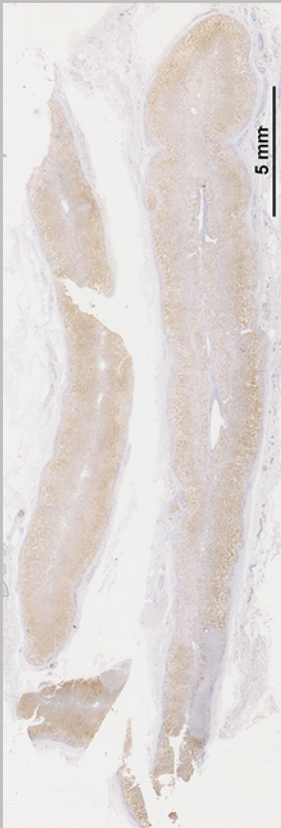

Case 22, A043

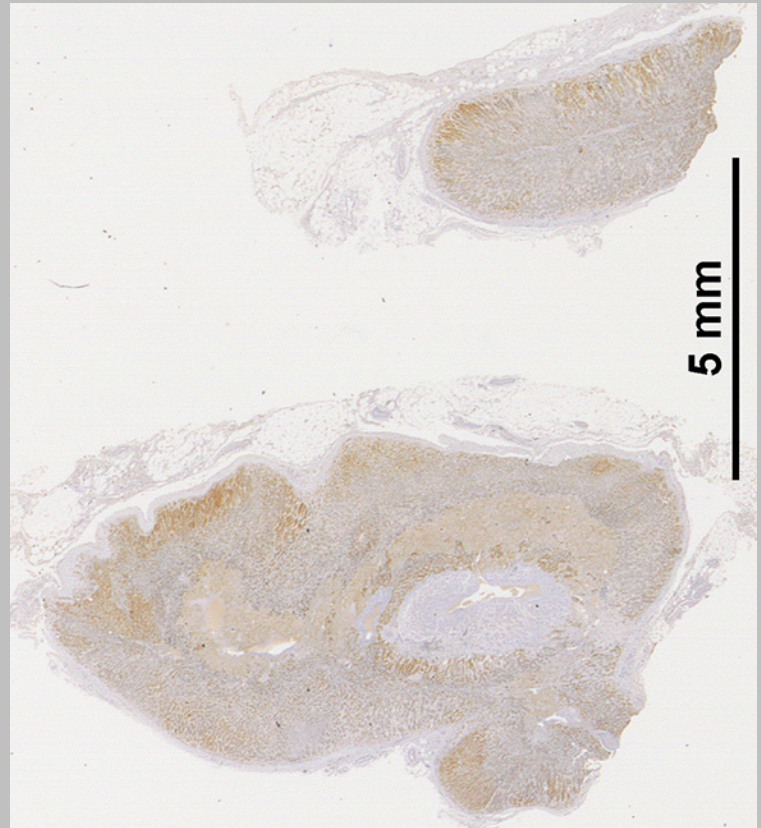

Case 23, A044

# Supplementary Figure 1

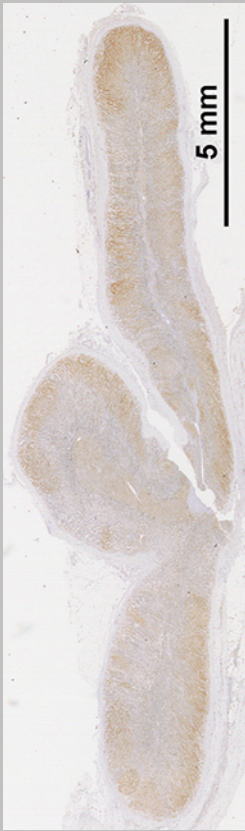

Case 23, A045

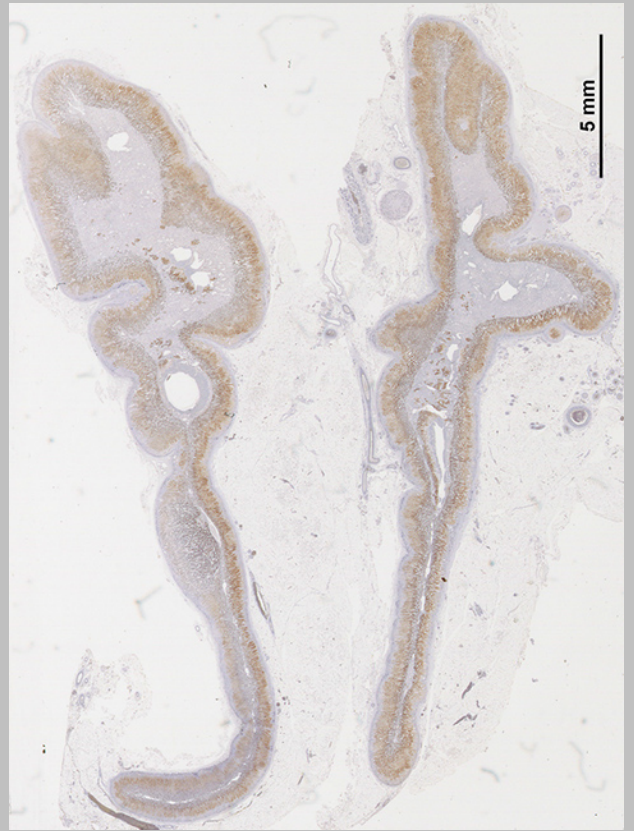

Case 24, A046

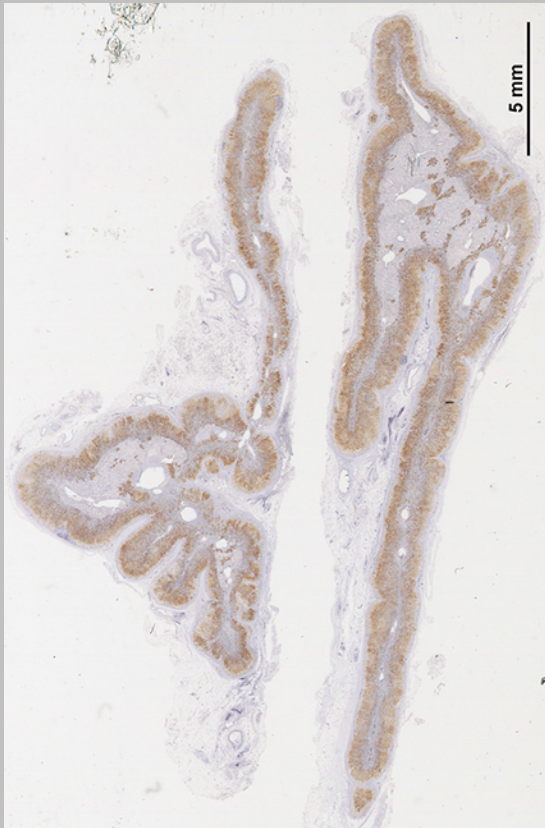

Case 25, A047

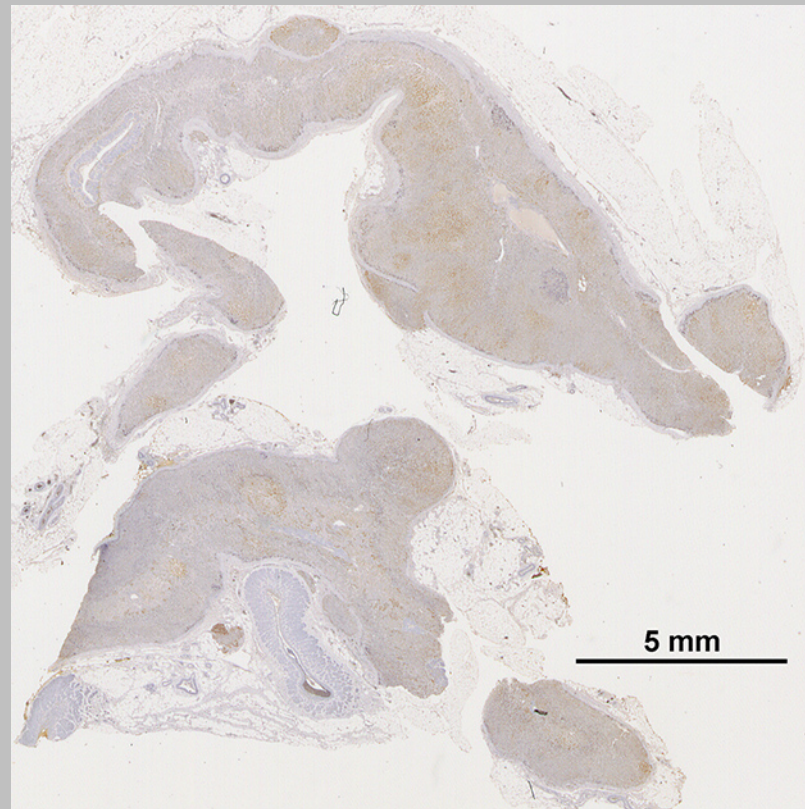

Case 27, A049

# Supplementary Figure 1

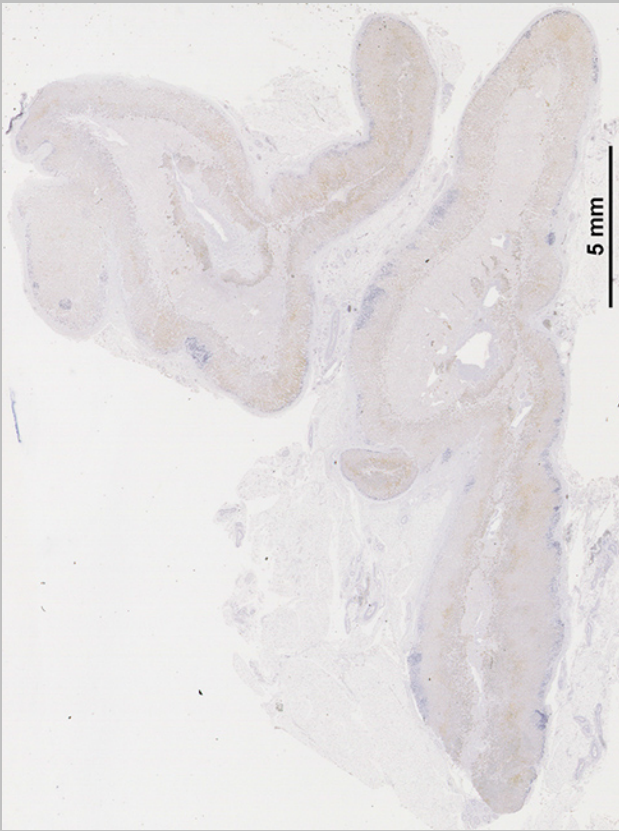

Case 28, A050

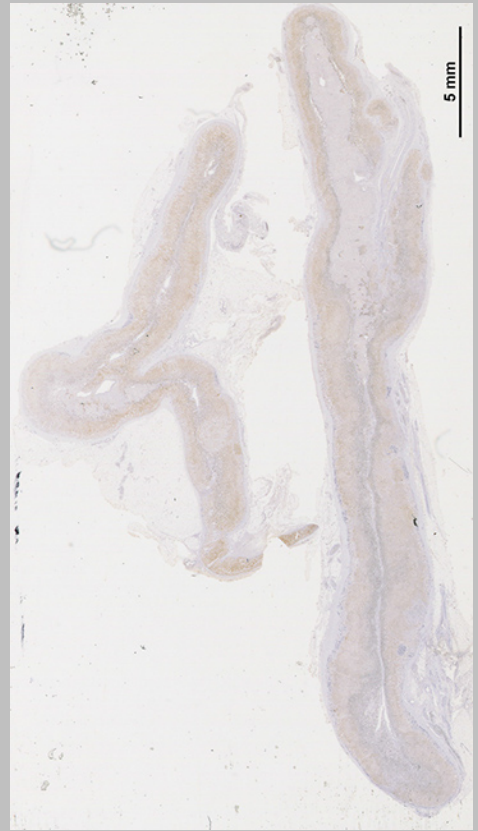

Case 29, A051

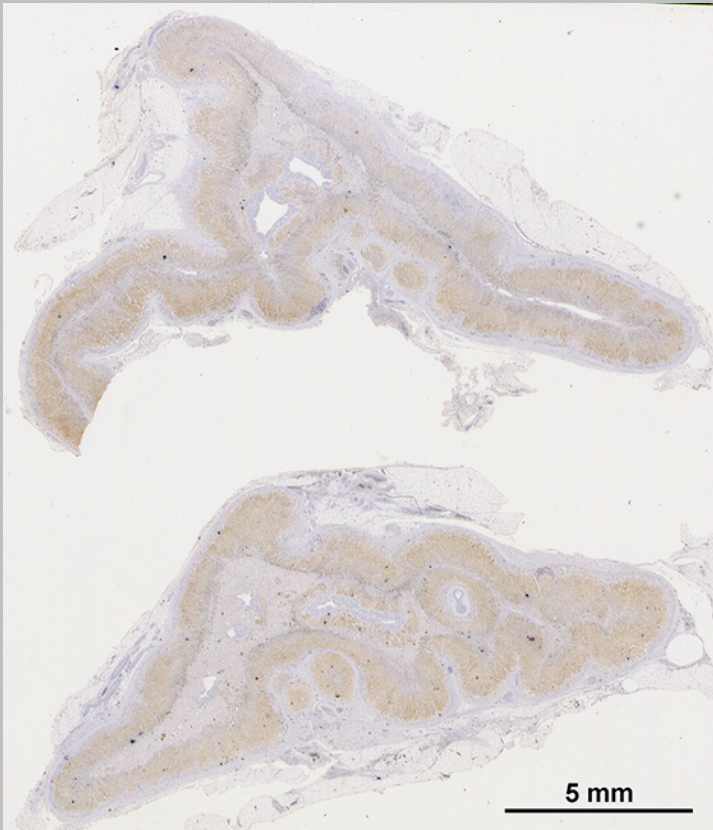

Case 30, A052

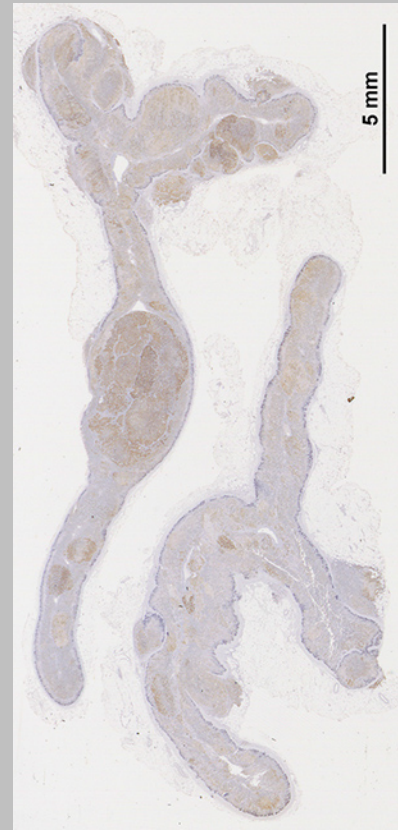

Case 31, A053

# Supplementary Figure 1

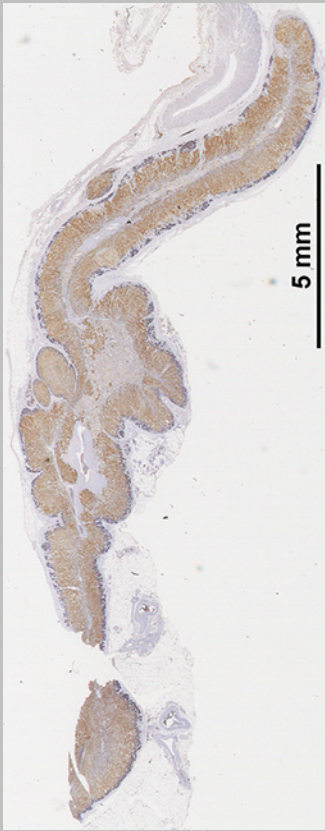

Case 32, A054

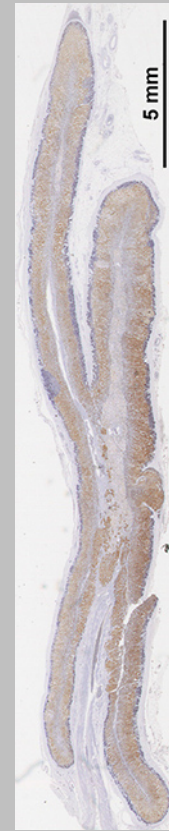

Case 32, A055

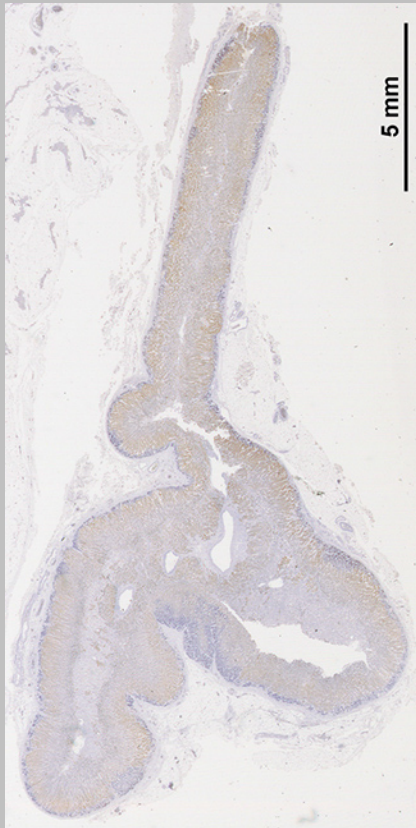

Case 36, A059

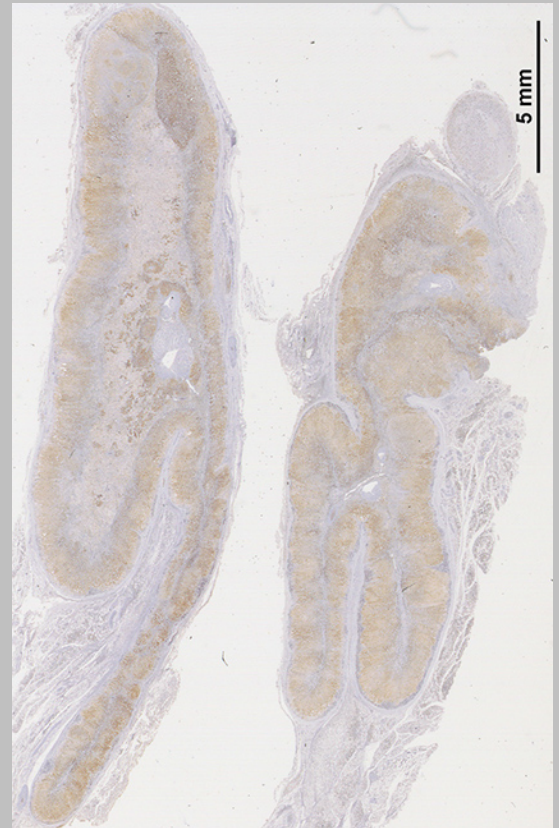

Case 37, A060

# Supplementary Figure 1

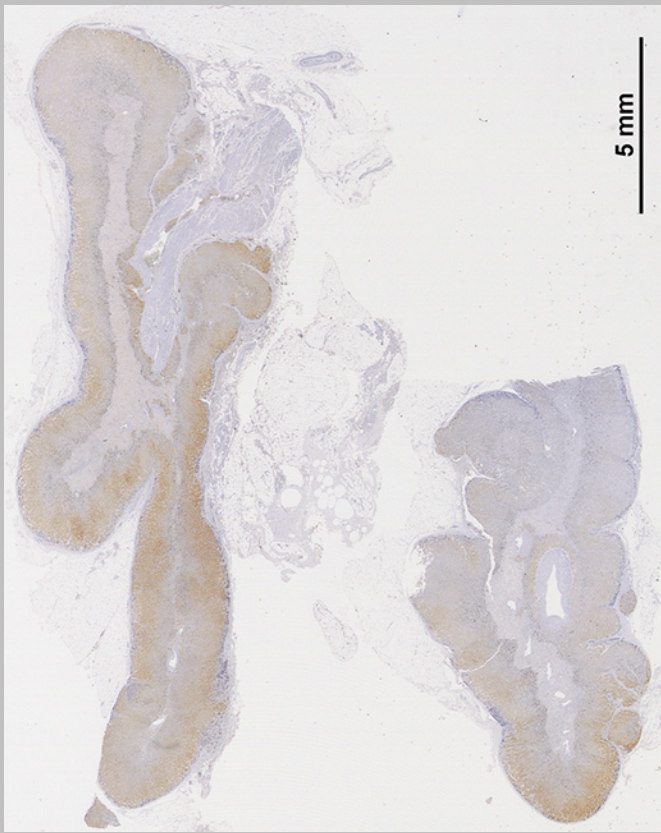

Case 38, A061

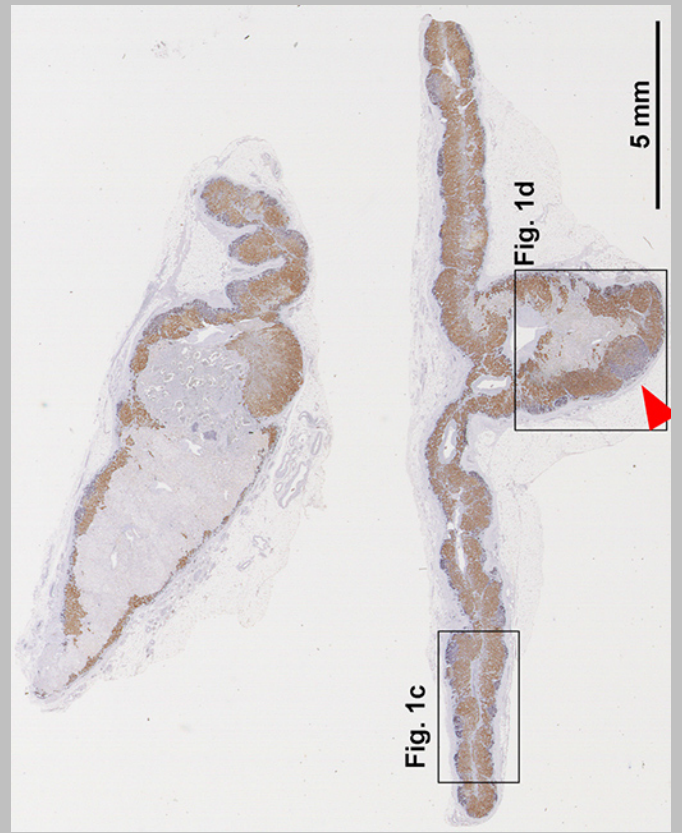

Case 40, A063

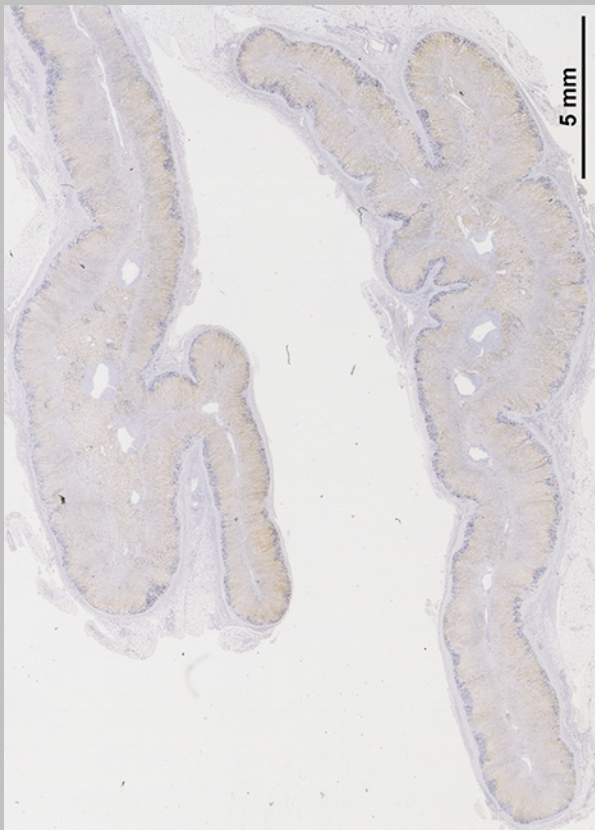

Case 42, A065

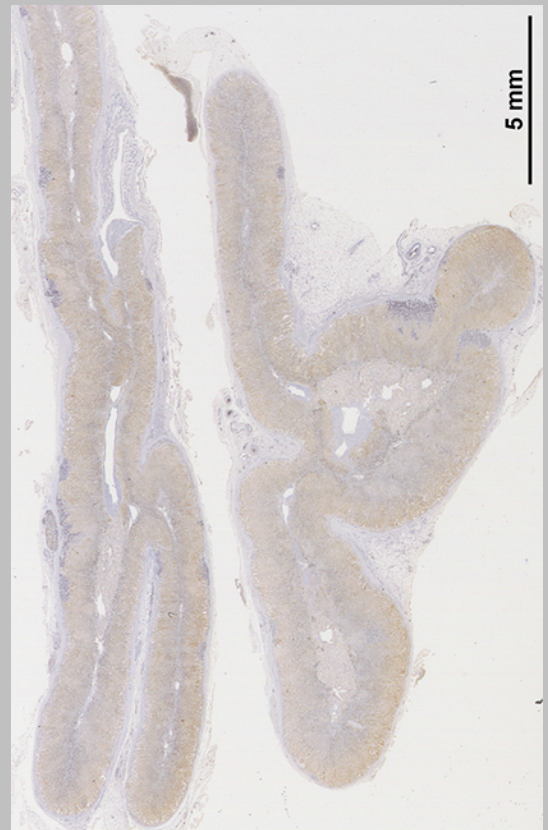

Case 43, A066



# Supplementary Figure 1

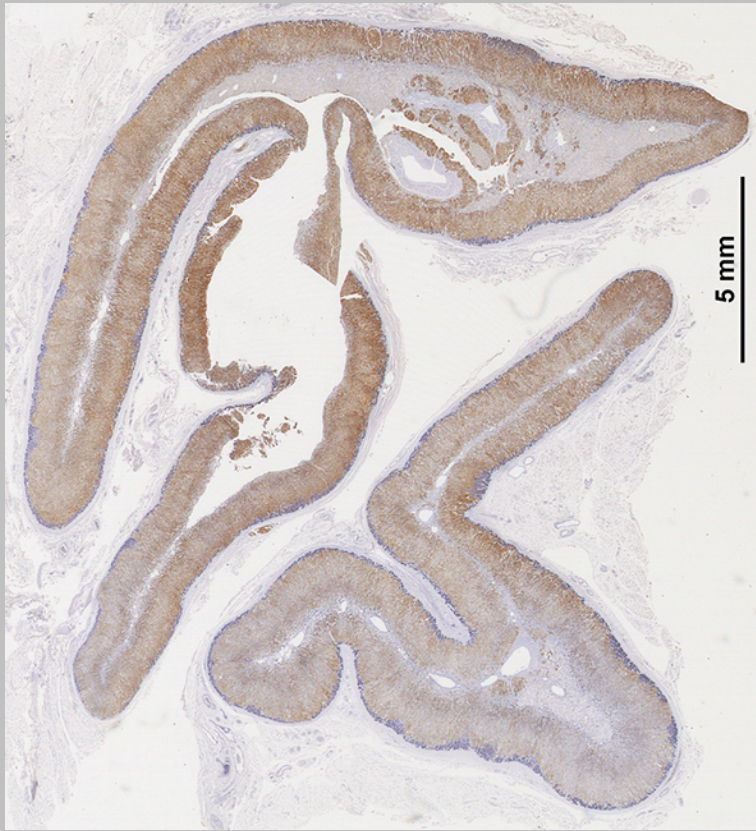

Case 44, A067

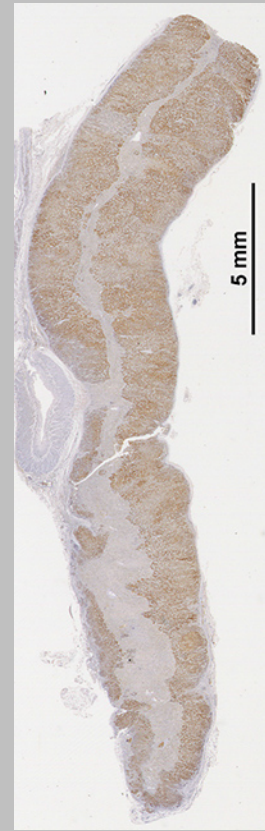

Case 47, A071

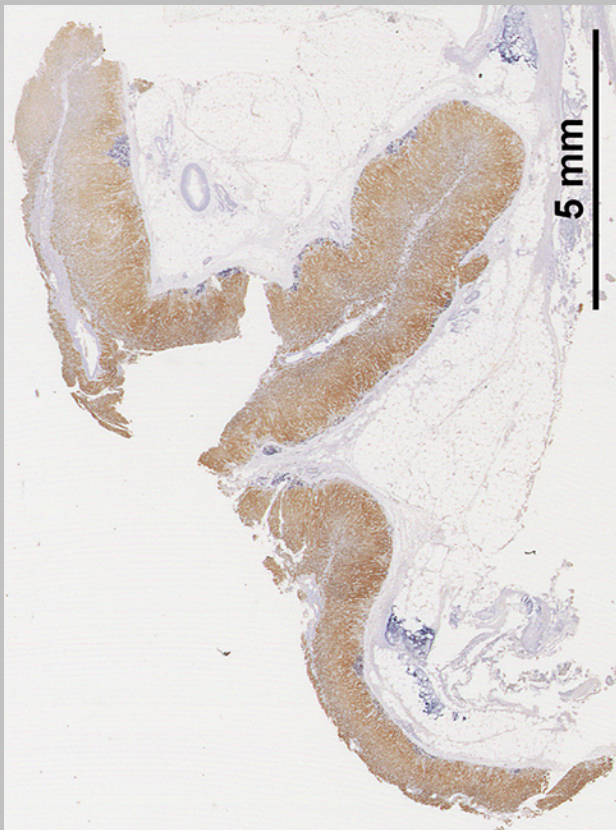

Case 48, A072

Supplementary Table 1.

| Case# | Section# | Age  | Sex | Cause of death                                 | KN         |                             | KM         |                             | TS         |                             | GEA        |                             | Average        |                             |
|-------|----------|------|-----|------------------------------------------------|------------|-----------------------------|------------|-----------------------------|------------|-----------------------------|------------|-----------------------------|----------------|-----------------------------|
|       |          |      |     |                                                | AA/WAA (%) | NOA/ WAA (mm <sup>2</sup> ) | AA/WAA (%) | NOA/ WAA (mm <sup>2</sup> ) | AA/WAA (%) | NOA/ WAA (mm <sup>2</sup> ) | AA/WAA (%) | NOA/ WAA (mm <sup>2</sup> ) | AA/WAA (%)     | NOA/ WAA (mm <sup>2</sup> ) |
| 1     | A021     | 0.75 | F   | post liver transplantation                     | 0.000      | 0.000                       | 0.000      | 0.000                       | 0.000      | 0.000                       | 0.000      | 0.000                       | 0.000 ± 0.000  | 0.000 ± 0.000               |
| 2     | A022     | 1    | M   | heterotaxy syndrome                            | 0.000      | 0.000                       | 0.000      | 0.000                       | 0.000      | 0.000                       | 0.000      | 0.000                       | 0.000 ± 0.000  | 0.000 ± 0.000               |
| 3     | A023     | 1    | F   | brain tumor                                    | 0.000      | 0.000                       | 0.000      | 0.000                       | 0.000      | 0.000                       | 0.000      | 0.000                       | 0.000 ± 0.000  | 0.000 ± 0.000               |
| 4     | A024     | 1.8  | M   | post liver transplantation                     | 0.000      | 0.000                       | 0.000      | 0.000                       | 0.000      | 0.000                       | 0.000      | 0.000                       | 0.000 ± 0.000  | 0.000 ± 0.000               |
| 5     | A025     | 2    | M   | acute lung dysfunction                         | 0.000      | 0.000                       | 0.000      | 0.000                       | 0.000      | 0.000                       | 0.000      | 0.000                       | 0.000 ± 0.000  | 0.000 ± 0.000               |
| 6     | A026     | 3    | F   | pulmonary dysfunction                          | 0.000      | 0.000                       | 0.000      | 0.000                       | 0.000      | 0.000                       | 0.000      | 0.000                       | 0.000 ± 0.000  | 0.000 ± 0.000               |
| 7     | A027     | 10   | M   | encephalopathy due to Reye's syndrome          | 0.000      | 0.000                       | 0.000      | 0.000                       | 0.000      | 0.000                       | 0.000      | 0.000                       | 0.000 ± 0.000  | 0.000 ± 0.000               |
| 8     | A028     | 11   | F   | malignant peripheral nerve sheath tumors       | 0.000      | 0.000                       | 0.000      | 0.000                       | 0.000      | 0.000                       | 0.000      | 0.000                       | 0.000 ± 0.000  | 0.000 ± 0.000               |
| * 9   | A029     | 17   | F   | liver cirrhosis                                |            |                             |            |                             |            |                             |            |                             |                |                             |
| 10    | A030     | 18   | M   | hemophagocytic syndrome                        | 0.000      | 0.000                       | 0.000      | 0.000                       | 0.169      | 0.069                       | 0.000      | 0.000                       | 0.042 ± 0.042  | 0.017 ± 0.017               |
| * 11  | A031     | 19   | M   | pulmonary hypertension                         |            |                             |            |                             |            |                             |            |                             |                |                             |
| 12    | A032     | 19   | F   | post liver transplantation                     | 0.000      | 0.000                       | 0.000      | 0.000                       | 0.000      | 0.000                       | 0.000      | 0.000                       | 0.000 ± 0.000  | 0.000 ± 0.000               |
| * 13  | A033     | 22   | M   | myocarditis                                    |            |                             |            |                             |            |                             |            |                             |                |                             |
| 14    | A034     | 22   | F   | malignant intrapelvic tumor                    | 5.324      | 0.298                       | 9.941      | 0.894                       | 10.663     | 0.954                       | 5.573      | 0.596                       | 7.875 ± 1.410  | 0.685 ± 0.151               |
| * 15  | A035     | 23   | M   | acute renal failure                            |            |                             |            |                             |            |                             |            |                             |                |                             |
| 16    | A036     | 24   | F   | pulmonary hypertension                         | 1.922      | 0.233                       | 1.653      | 0.280                       | 2.520      | 0.373                       | 1.392      | 0.140                       | 1.871 ± 0.242  | 0.257 ± 0.049               |
| * 17  | A037     | 24   | M   | brain hemorrhage                               |            |                             |            |                             |            |                             |            |                             |                |                             |
| * 18  | A038     | 24   | M   | acute myelocytic leukemia                      |            |                             |            |                             |            |                             |            |                             |                |                             |
| 19    | A039     | 28   | F   | pulmonary alveolar hemorrhage                  | 1.412      | 0.128                       | 0.294      | 0.064                       | 1.569      | 0.128                       | 1.099      | 0.064                       | 1.094 ± 0.284  | 0.096 ± 0.018               |
| * 20  | A040, A0 | 28   | M   | sepsis                                         |            |                             |            |                             |            |                             |            |                             |                |                             |
| 21    | A042     | 29   | M   | sepsis due to acute myelocytic leukemia        | 0.000      | 0.000                       | 0.000      | 0.000                       | 0.485      | 0.000                       | 0.777      | 0.066                       | 0.315 ± 0.192  | 0.016 ± 0.016               |
| 22    | A043     | 29   | F   | subarachnoid hemorrhage                        | 0.000      | 0.000                       | 0.000      | 0.000                       | 0.000      | 0.000                       | 0.000      | 0.000                       | 0.000 ± 0.000  | 0.000 ± 0.000               |
| 23    | A044, A0 | 33   | M   | sepsis                                         | 0.000      | 0.000                       | 0.000      | 0.000                       | 0.000      | 0.000                       | 0.000      | 0.000                       | 0.000 ± 0.000  | 0.000 ± 0.000               |
| 24    | A046     | 33   | M   | acute heart failure                            | 0.000      | 0.000                       | 0.000      | 0.000                       | 0.066      | 0.060                       | 0.000      | 0.000                       | 0.016 ± 0.016  | 0.015 ± 0.015               |
| 25    | A047     | 34   | M   | aorta stenosis                                 | 0.795      | 0.250                       | 0.723      | 0.188                       | 1.327      | 0.250                       | 0.614      | 0.063                       | 0.865 ± 0.159  | 0.188 ± 0.044               |
| * 26  | A048     | 36   | F   | brain tumor                                    |            |                             |            |                             |            |                             |            |                             |                |                             |
| 27    | A049     | 38   | F   | sepsis                                         | 3.237      | 0.292                       | 0.860      | 0.097                       | 0.718      | 0.097                       | 1.459      | 0.195                       | 1.568 ± 0.579  | 0.171 ± 0.047               |
| 28    | A050     | 38   | M   | liver cirrhosis                                | 3.550      | 0.369                       | 6.115      | 0.474                       | 7.646      | 0.580                       | 3.312      | 0.264                       | 5.156 ± 1.045  | 0.422 ± 0.068               |
| 29    | A051     | 39   | M   | myelodysplastic syndrome                       | 0.637      | 0.140                       | 0.660      | 0.187                       | 0.458      | 0.093                       | 0.550      | 0.047                       | 0.576 ± 0.046  | 0.117 ± 0.030               |
| 30    | A052     | 40   | F   | gastric cancer                                 | 0.895      | 0.152                       | 0.770      | 0.152                       | 2.162      | 0.228                       | 2.255      | 0.152                       | 1.520 ± 0.399  | 0.171 ± 0.019               |
| 31    | A053     | 40   | F   | pulmonitis due to systemic lupus erythematosus | 0.000      | 0.000                       | 0.000      | 0.000                       | 0.000      | 0.000                       | 0.415      | 0.085                       | 0.104 ± 0.104  | 0.021 ± 0.021               |
| 32    | A054, A0 | 41   | F   | ovarian carcinoma                              | 1.575      | 0.085                       | 2.318      | 0.256                       | 3.696      | 0.512                       | 1.411      | 0.256                       | 2.250 ± 3.099  | 0.277 ± 0.088               |
| * 33  | A056     | 42   | F   | heart failure                                  |            |                             |            |                             |            |                             |            |                             |                |                             |
| * 34  | A057     | 43   | M   | convulsion, respiration failure                |            |                             |            |                             |            |                             |            |                             |                |                             |
| * 35  | A058     | 44   | F   | uterine sarcoma                                |            |                             |            |                             |            |                             |            |                             |                |                             |
| 36    | A059     | 44   | F   | renal cell carcinoma                           | 20.350     | 0.399                       | 10.896     | 0.399                       | 21.947     | 0.599                       | 8.255      | 0.399                       | 15.362 ± 3.400 | 0.449 ± 0.050               |
| 37    | A060     | 45   | M   | heart failure                                  | 1.683      | 0.329                       | 0.899      | 0.219                       | 1.420      | 0.329                       | 0.915      | 0.219                       | 1.229 ± 0.194  | 0.274 ± 0.032               |
| 38    | A061     | 45   | M   | lung cancer                                    | 0.967      | 0.074                       | 0.747      | 0.148                       | 2.661      | 0.296                       | 2.709      | 0.148                       | 1.771 ± 0.530  | 0.166 ± 0.047               |
| * 39  | A062     | 45   | M   | acute leukemia                                 |            |                             |            |                             |            |                             |            |                             |                |                             |
| 40    | A063     | 45   | M   | hepatic failure due to liver cancer            | 6.128      | 0.563                       | 8.023      | 1.000                       | 7.194      | 0.750                       | 3.444      | 0.375                       | 6.197 ± 0.996  | 0.672 ± 0.134               |
| * 41  | A064     | 45   | M   | C type hepatitis                               |            |                             |            |                             |            |                             |            |                             |                |                             |
| 42    | A065     | 45   | M   | heart failure                                  | 0.804      | 0.051                       | 3.470      | 0.358                       | 12.272     | 1.126                       | 5.803      | 0.716                       | 5.587 ± 2.451  | 0.563 ± 0.232               |
| 43    | A066     | 47   | M   | bronchiectasis                                 | 5.379      | 0.339                       | 6.231      | 0.621                       | 8.916      | 0.847                       | 3.564      | 0.282                       | 6.022 ± 1.113  | 0.523 ± 0.131               |
| 44    | A067     | 48   | F   | pulmonary hypertension                         | 0.804      | 0.137                       | 1.629      | 0.137                       | 3.923      | 0.548                       | 1.328      | 0.228                       | 1.921 ± 0.689  | 0.263 ± 0.098               |

|   |           |             |           |          |                           |       |       |       |       |       |       |       |       |              |                |              |                |              |                |  |
|---|-----------|-------------|-----------|----------|---------------------------|-------|-------|-------|-------|-------|-------|-------|-------|--------------|----------------|--------------|----------------|--------------|----------------|--|
| * | 45        | A068        | 49        | M        | myelodysplastic syndrome  |       |       |       |       |       |       |       |       |              |                |              |                |              |                |  |
| * | 46        | A069, A07   | 50        | M        | gastric carcinoma         |       |       |       |       |       |       |       |       |              |                |              |                |              |                |  |
|   | <b>47</b> | <b>A071</b> | <b>50</b> | <b>M</b> | <b>heart failure</b>      | 0.000 | 0.000 | 0.000 | 0.000 | 0.000 | 0.000 | 0.000 | 0.000 | 0.000        | 0.000          | <b>0.000</b> | <b>± 0.000</b> | <b>0.000</b> | <b>± 0.000</b> |  |
|   | <b>48</b> | <b>A072</b> | <b>37</b> | <b>M</b> | <b>acute pancreatitis</b> | 2.290 | 0.504 | 3.283 | 1.008 | 6.368 | 1.259 | 1.855 | 0.252 | <b>3.449</b> | <b>± 1.018</b> | <b>0.756</b> | <b>± 0.230</b> |              |                |  |

\*: removed samples due to low quality staining. Bold characters are shown in Table 1. Each value of AA/WAA and NOA/WAA analyzed by KN, KM, TS, and GEA is shown.
